# Supplementary material
Source: PubMed Central journal article supplement (PMC3222519)

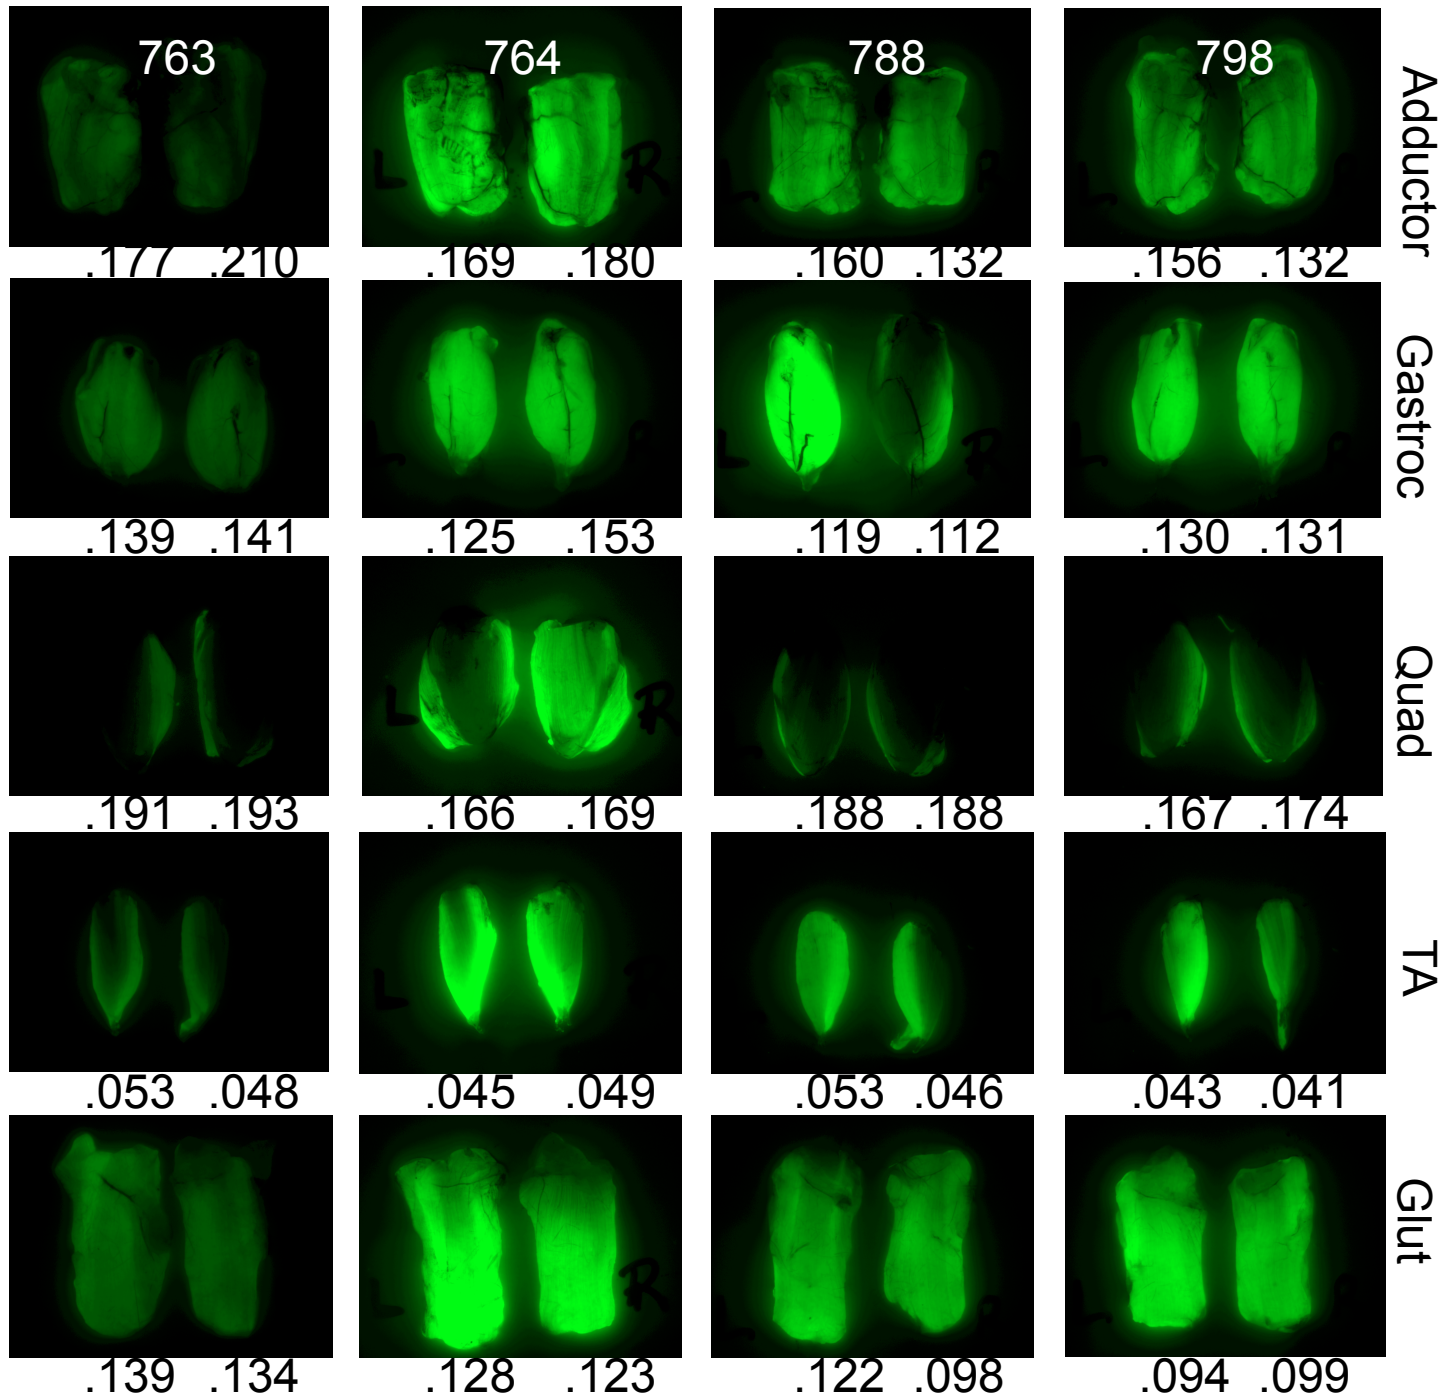

C57BL/6  
mice  
miFRG1  
virus

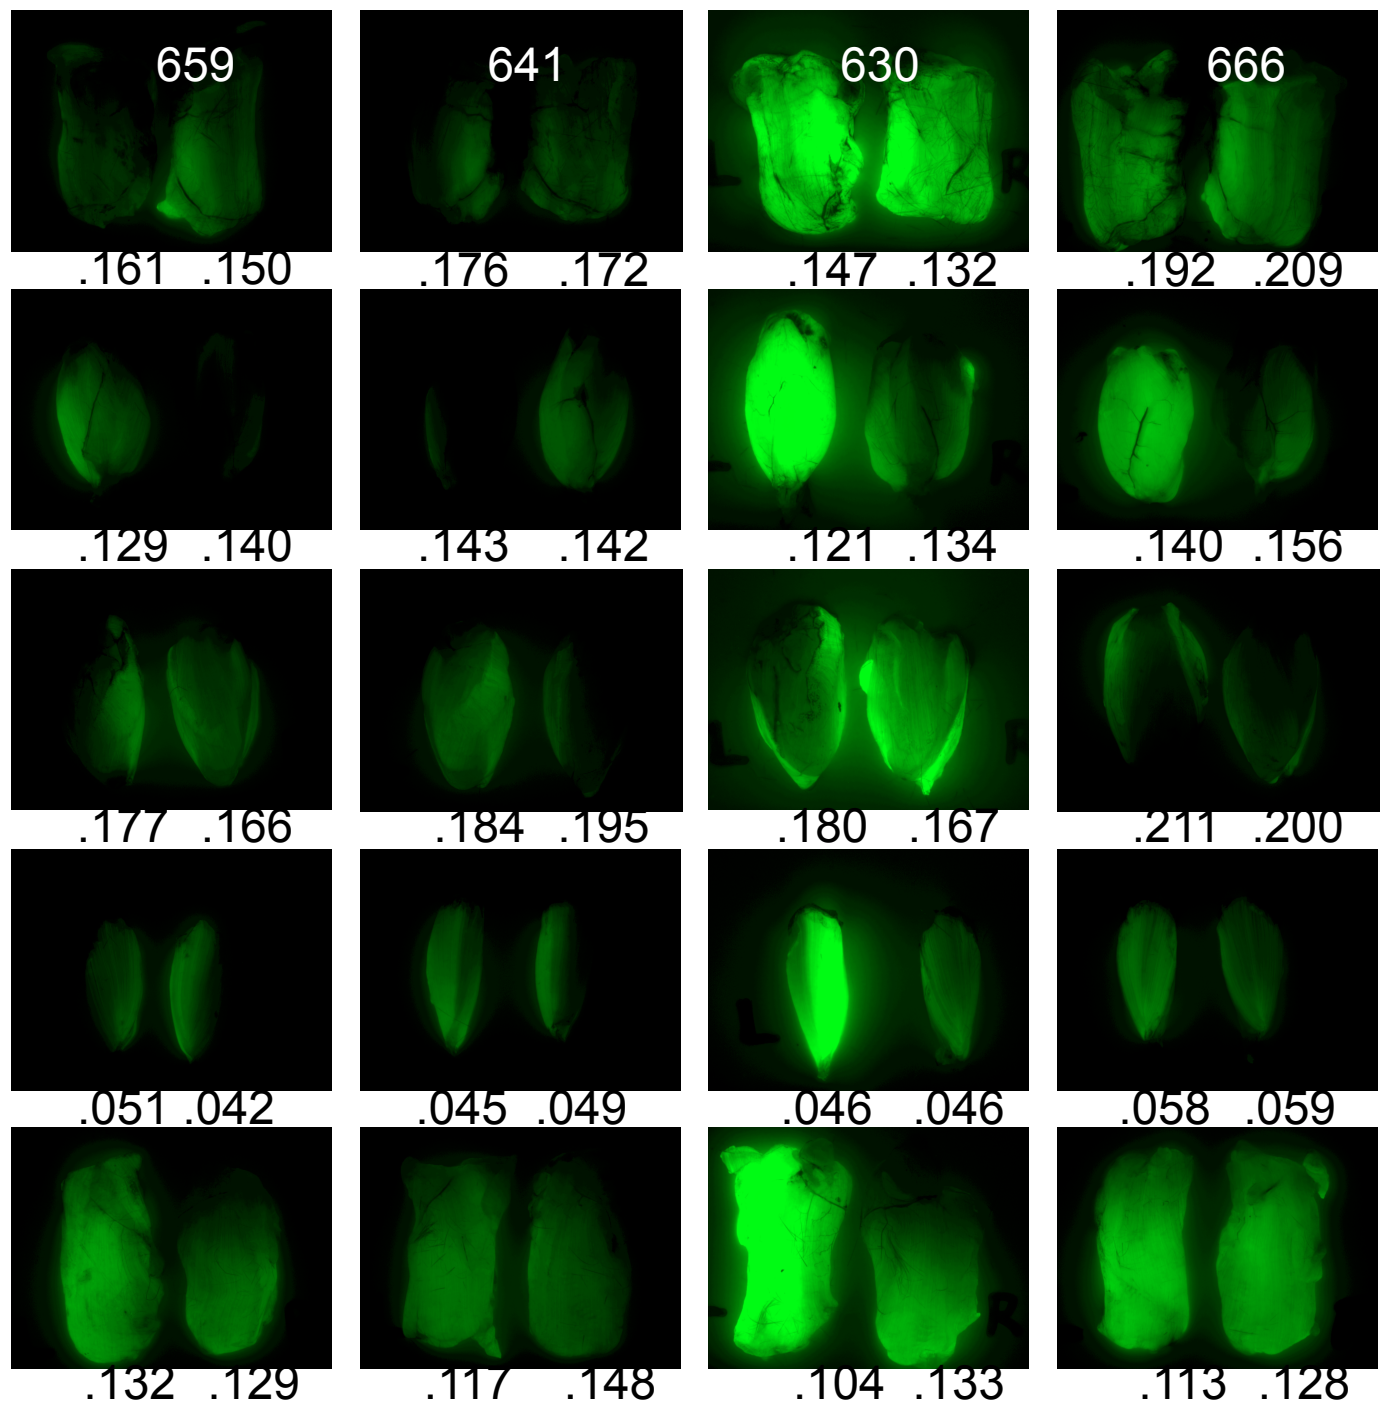

Adductor

Gastroc

Quad

TA

Glut

C57BL/6 mice  
miGFP virus





FRG1<sup>-high</sup> mice - Gastrocnemius

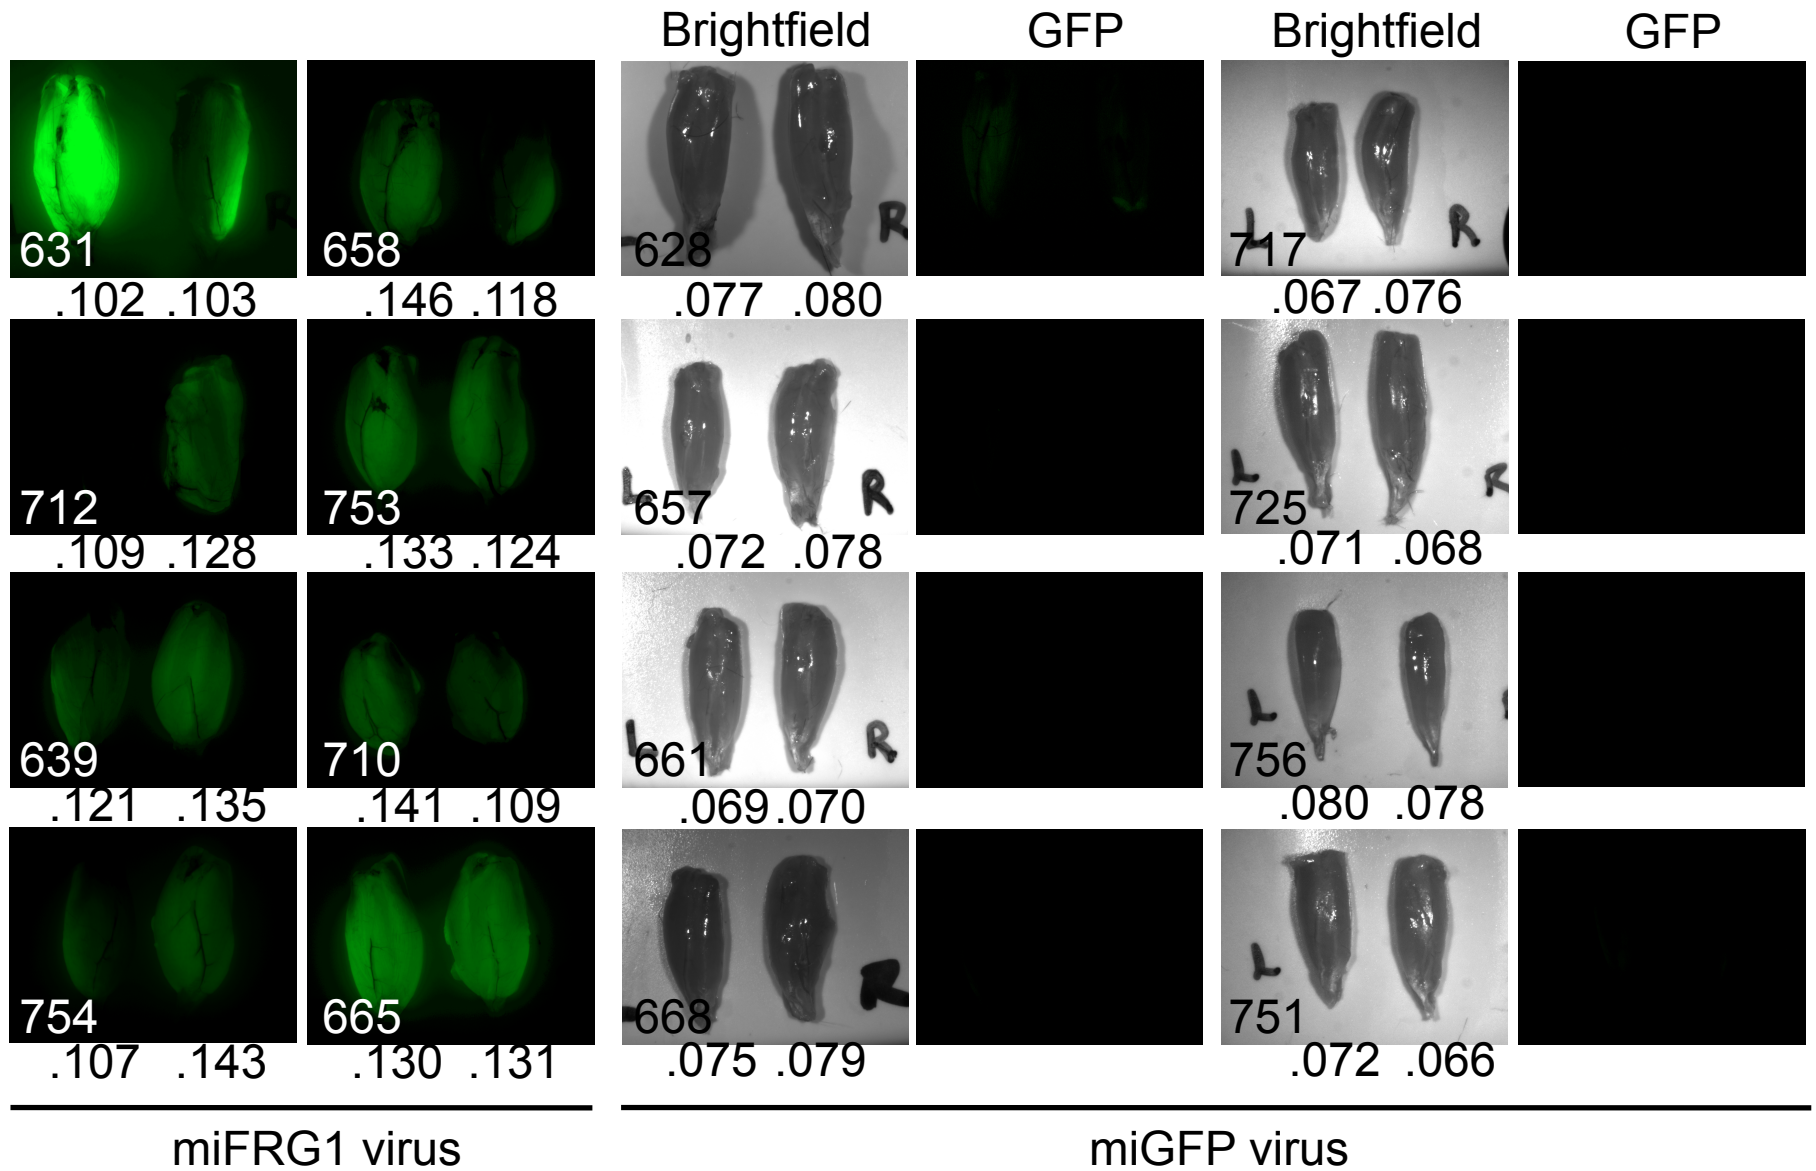

FRG1<sup>-high</sup> mice - Quadriceps

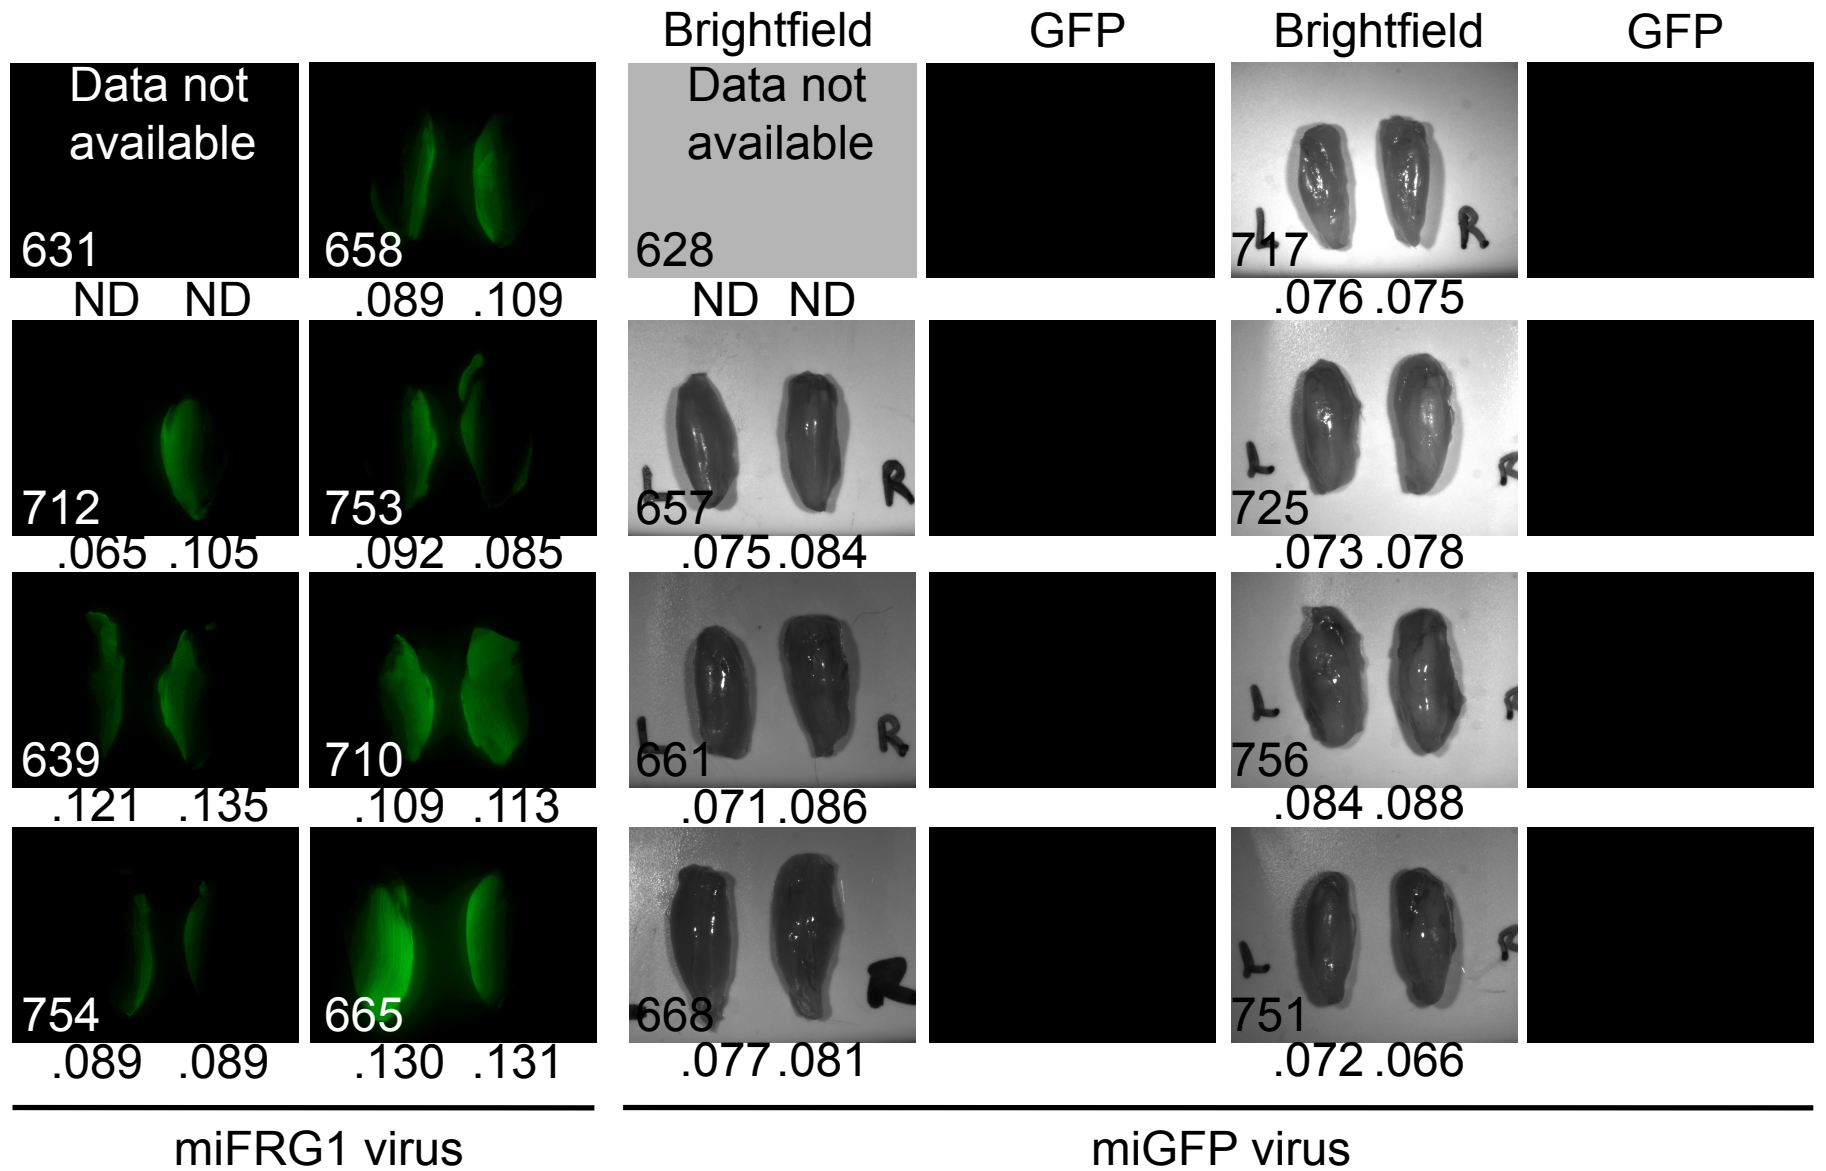

FRG1<sup>-high</sup> mice - TA

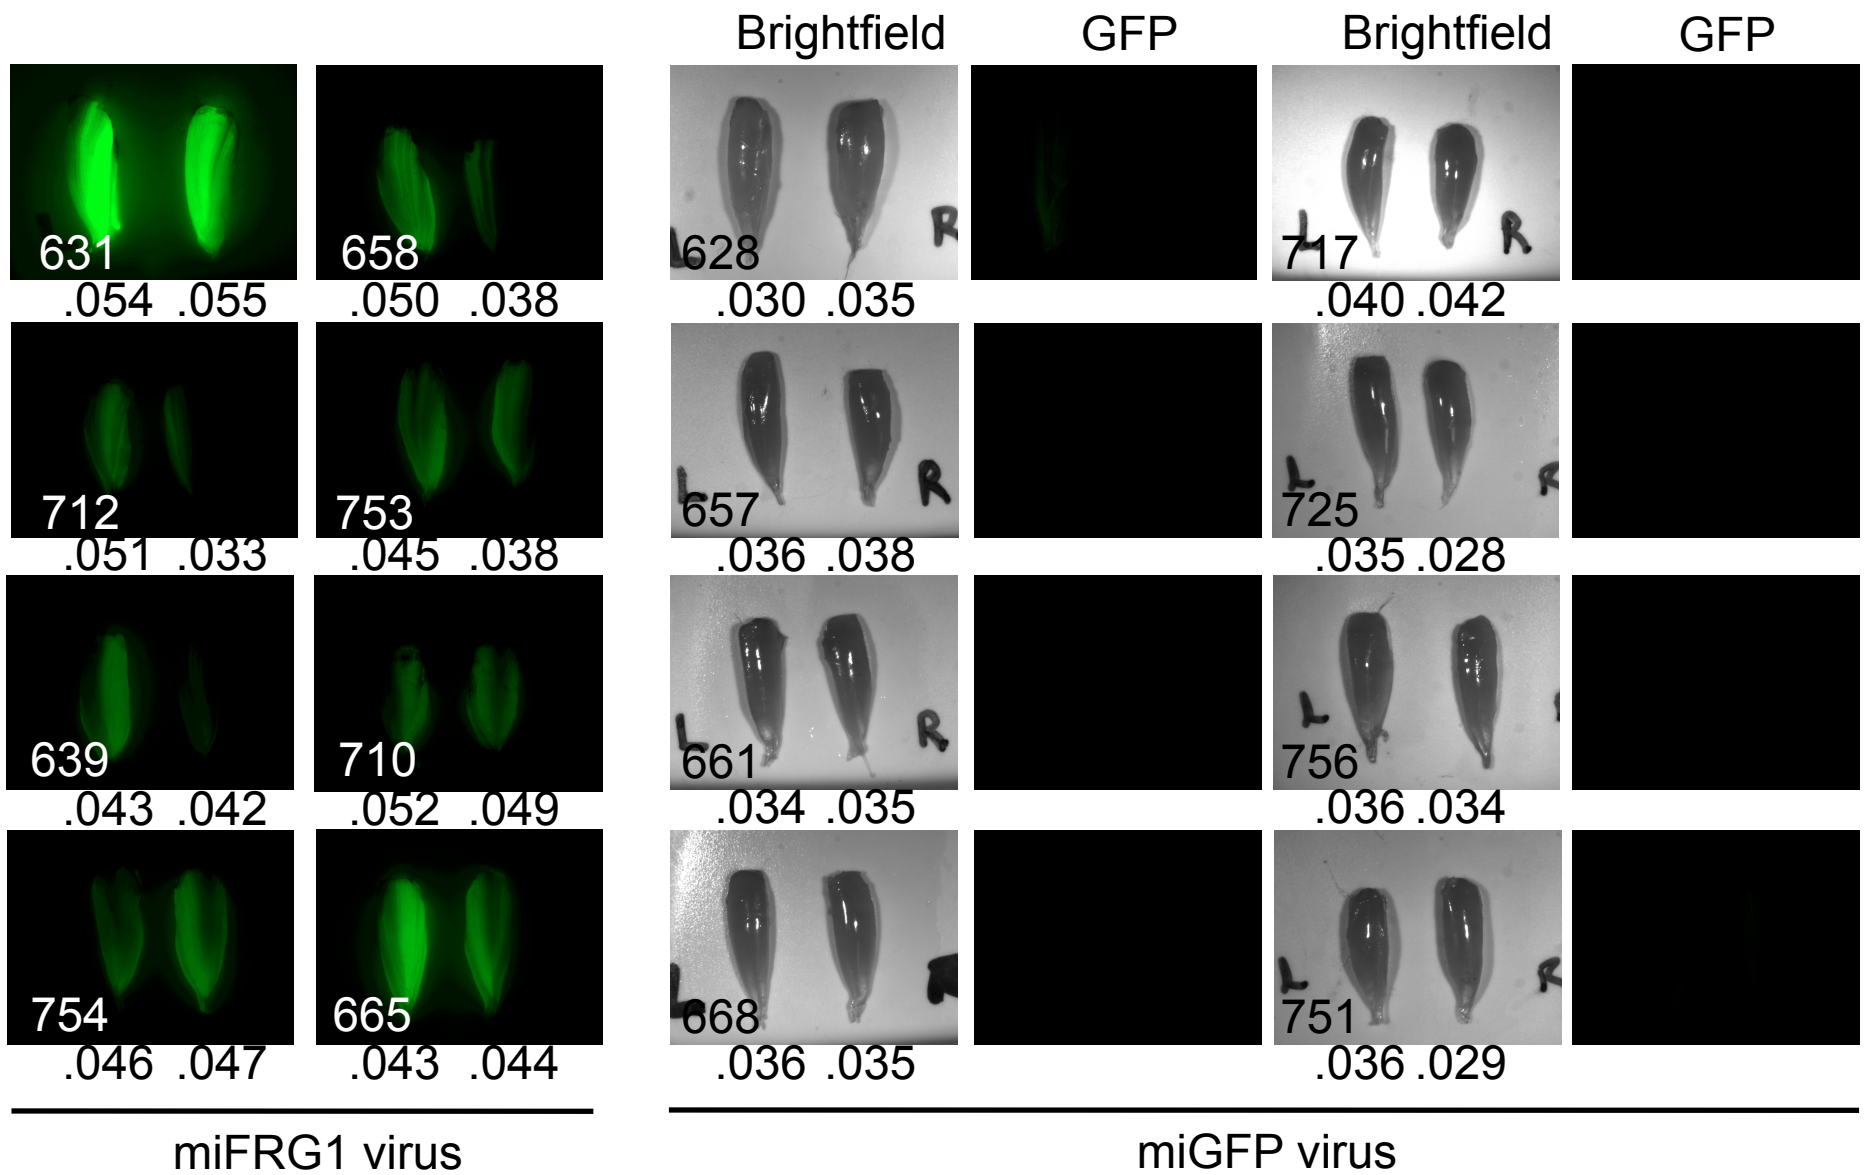



FRG1<sup>-high</sup> mice - Gluteus

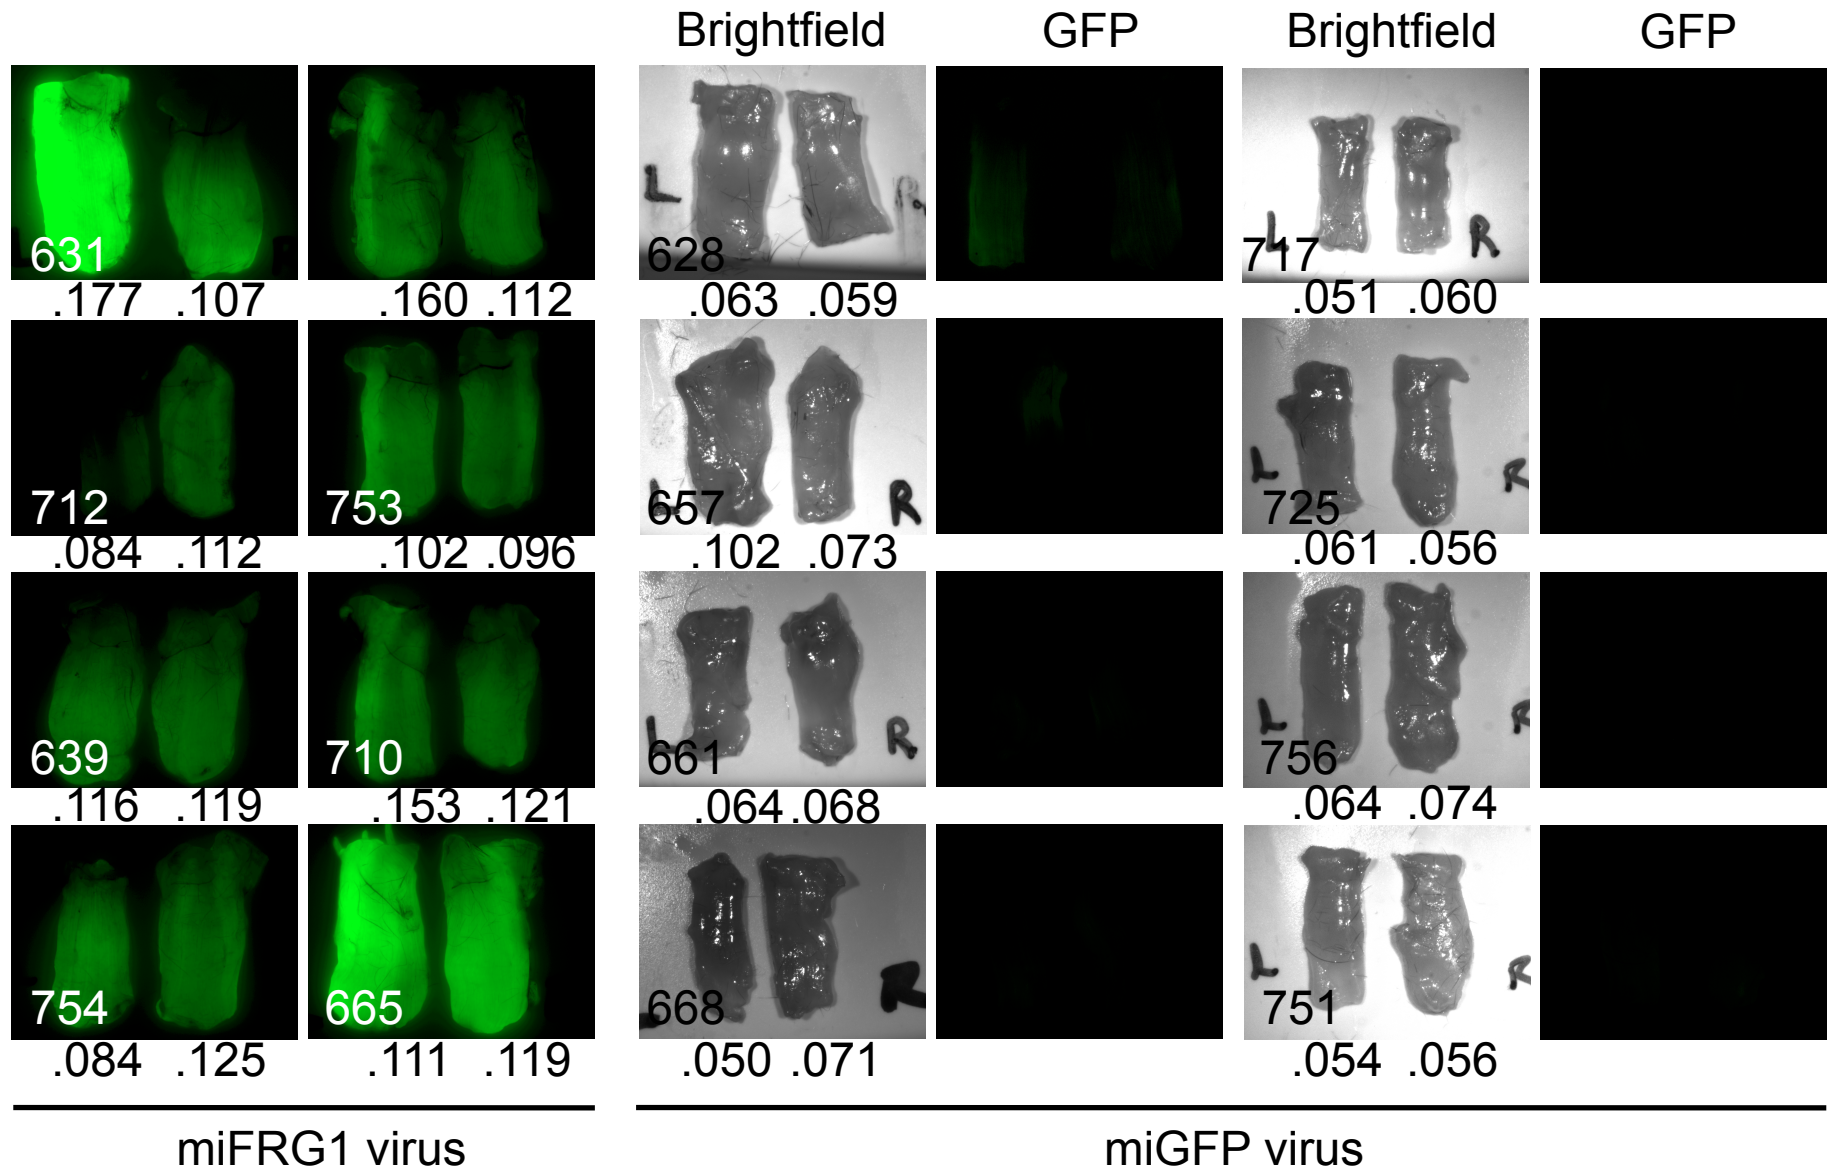

Supplement: mt2011118x2.pdf [file mt2011118x2.pdf]
