# Supplementary material
Source: PubMed Central journal article supplement (PMC3222519)

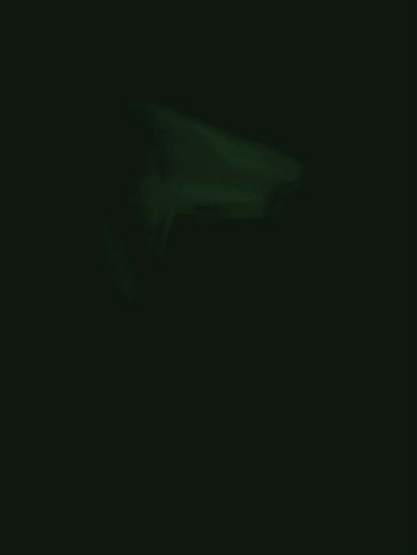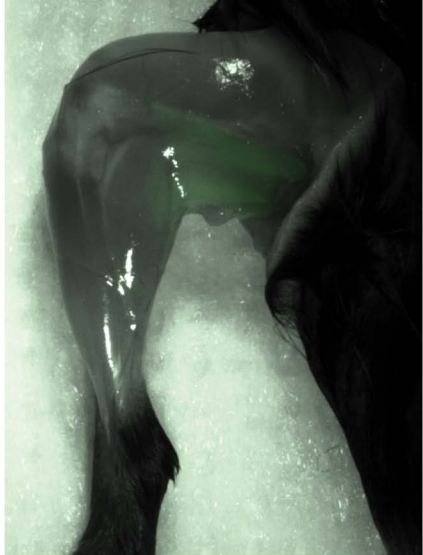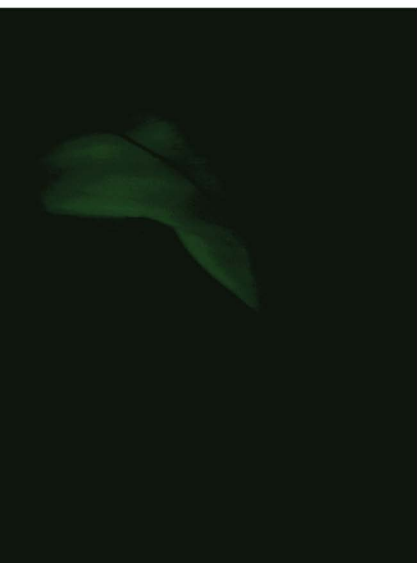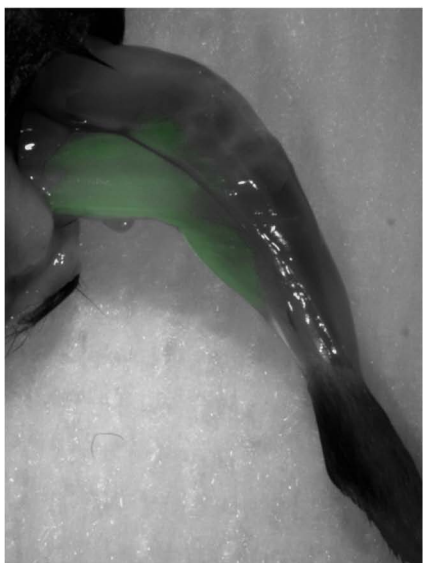

**3 weeks post-injection  
AAV6.miGFP vector**

Supplement: mt2011118x3.pdf [file mt2011118x3.pdf]

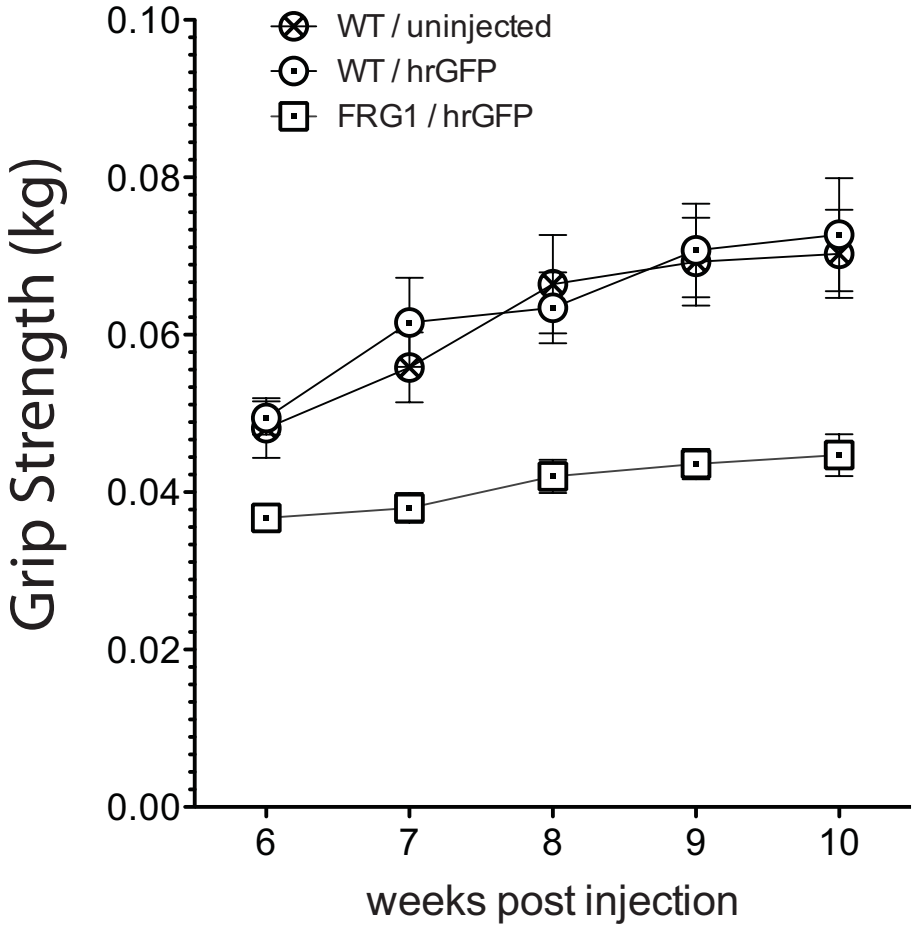

Supplement: mt2011118x4.pdf [file mt2011118x4.pdf]
